# Supplementary material for: Revealing Critical Characteristics of Mobility Patterns in New York City During the Onset of COVID-19 Pandemic
Source: Frontiers journal article supplement (doi:10.3389/fbuil.2021.654409), 2022-01-31
Supplement: Data_Sheet_1.docx [file Data_Sheet_1.docx]

**APPENDIX**

**1. Facebook Density change results**


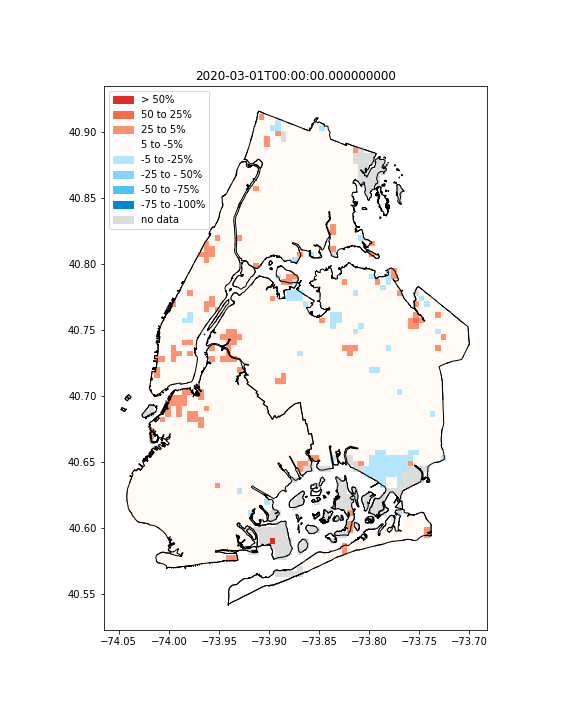
Figure S1: Weekly aggregated population density change in percent with respect to baseline – Week 1
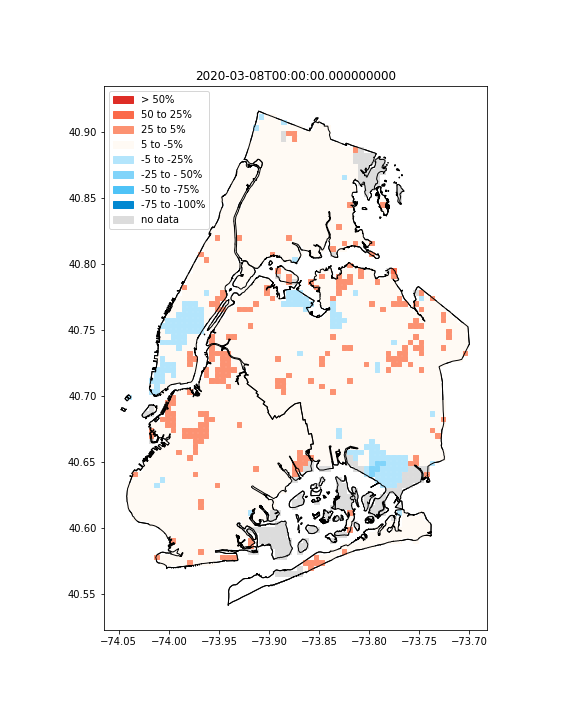


Figure S2: Weekly aggregated population density change in percent with respect to baseline - Week 2
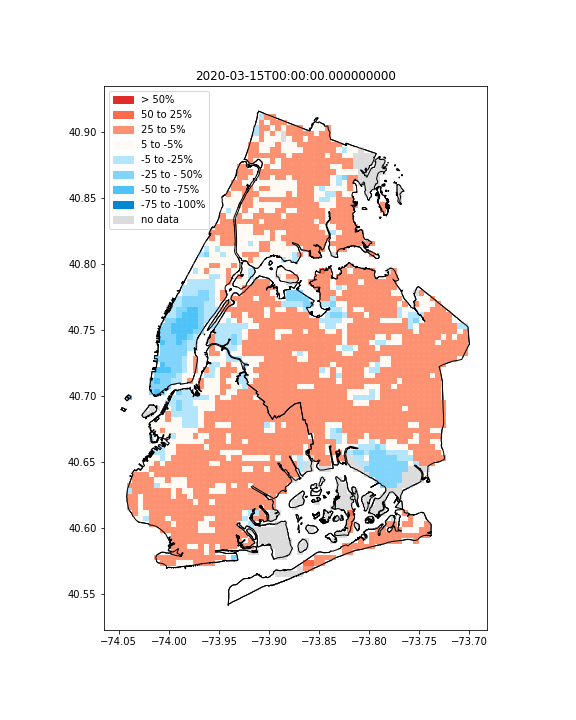
Figure S3: Weekly aggregated population density change in percent with respect to baseline - Week 3
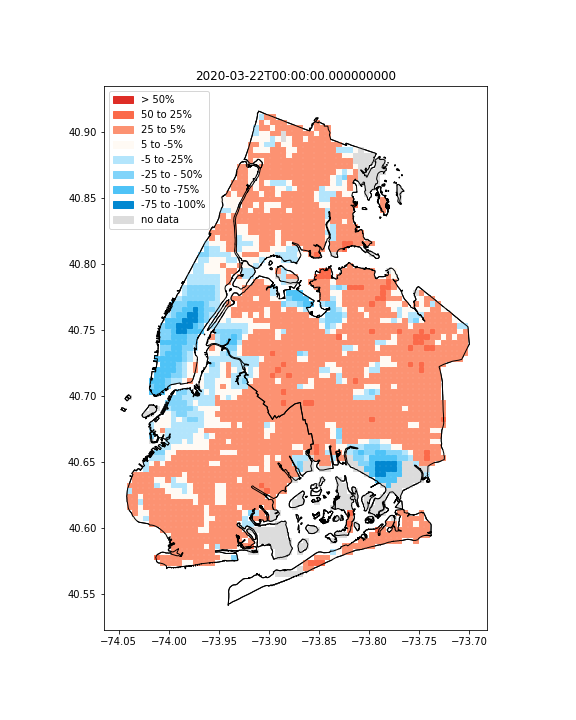
Figure S4: Weekly aggregated population density change in percent with respect to baseline - Week 4


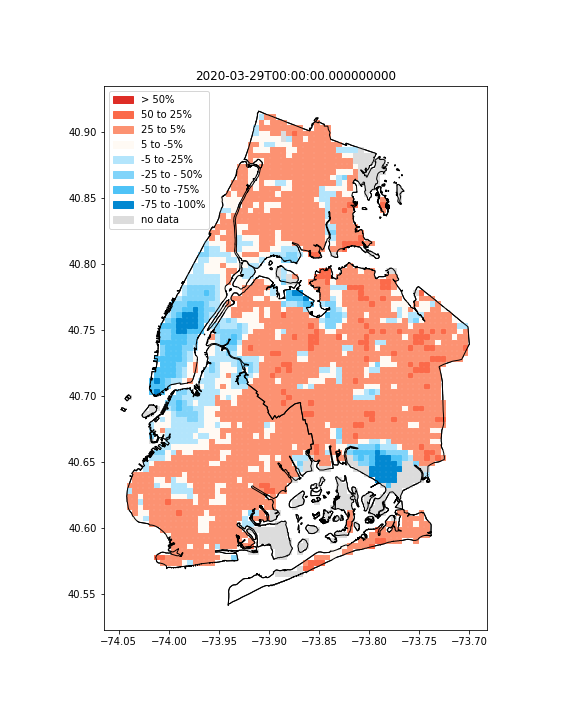
Figure S5: Weekly aggregated population density change in percent with respect to baseline - Week 5 **
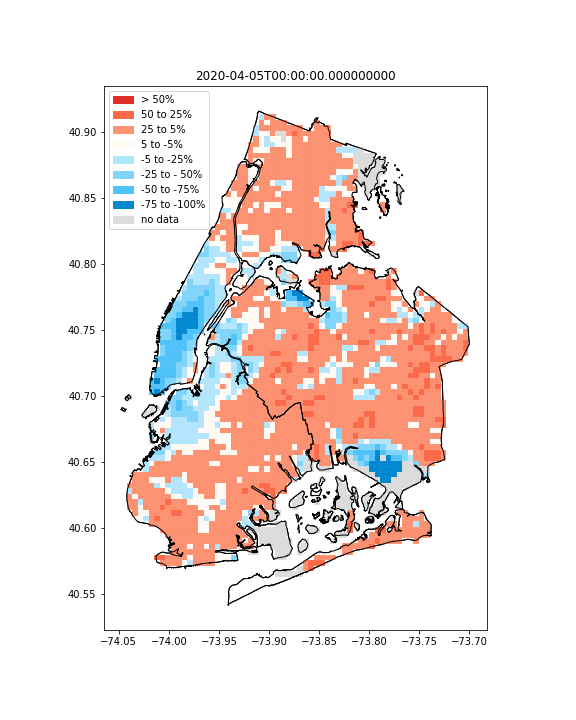
**Figure S6: Weekly aggregated population density change in percent with respect to baseline - Week 6
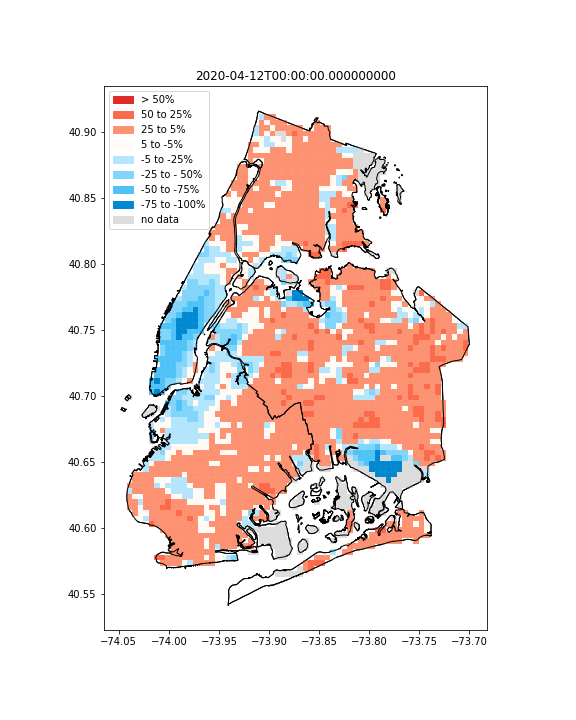
Figure S7: Weekly aggregated population density change in percent with respect to baseline - Week 7
 **
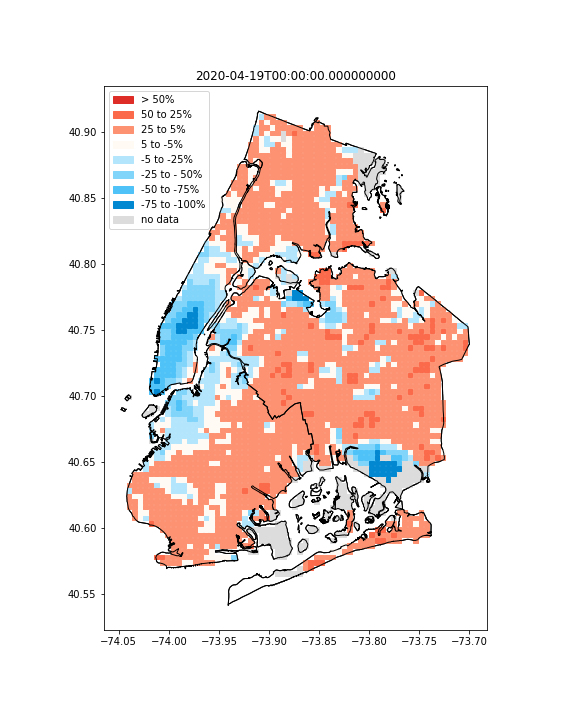
**Figure S8: Weekly aggregated population density change in percent with respect to baseline - Week 8
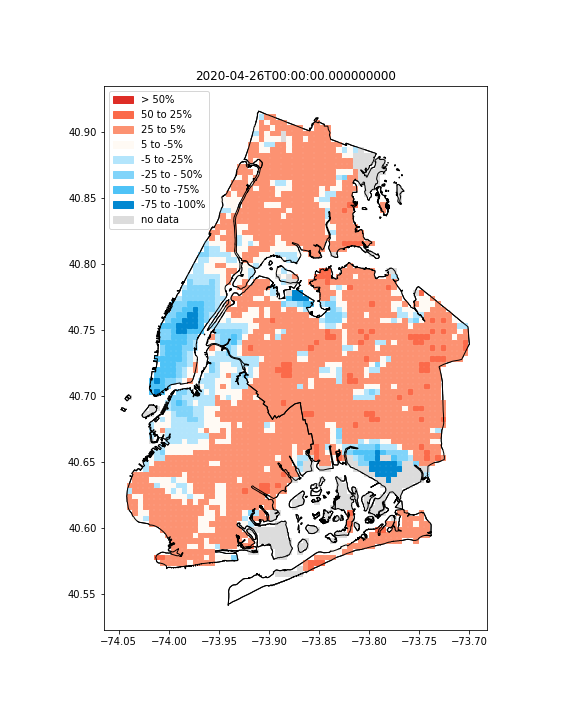
Figure S9: Weekly aggregated population density change in percent with respect to baseline - Week 9

**2. Hotspot/non-hotspot movement results**


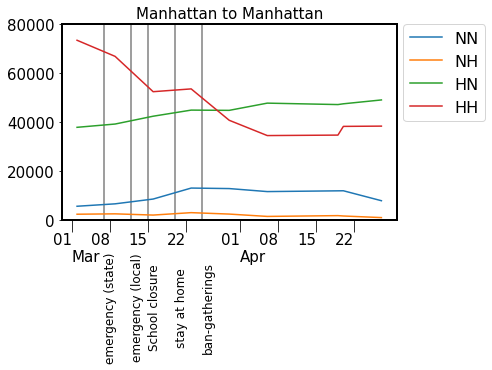
Figure S13: Hotspot and non-hotspot movement trends


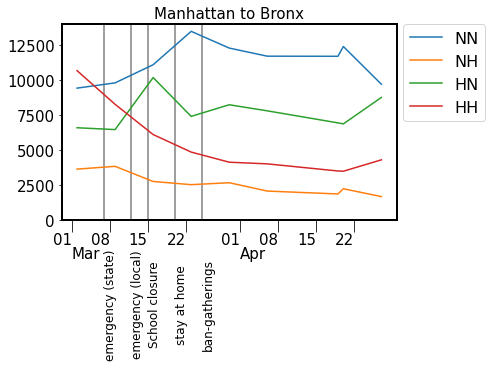
Figure S14: Hotspot and non-hotspot movement trends
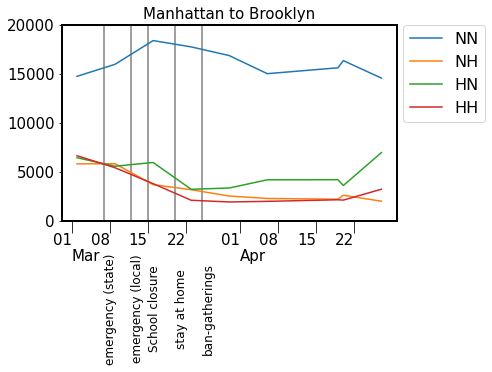
Figure S15: Hotspot and non-hotspot movement trends


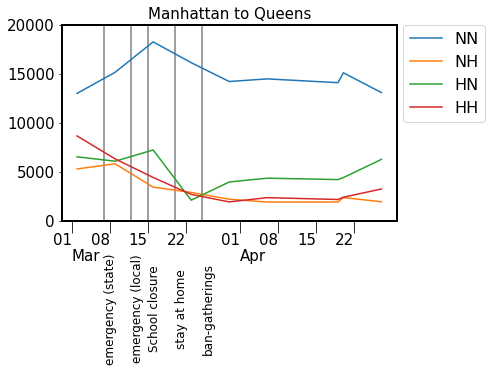
Figure S16: Hotspot and non-hotspot movement trends
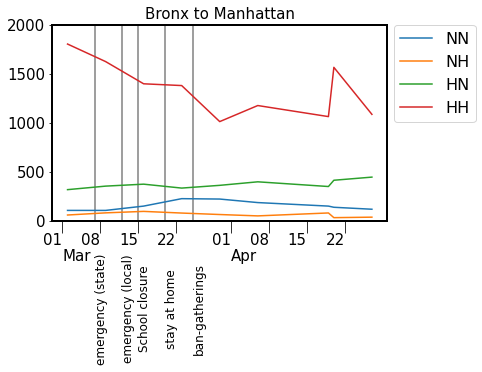
Figure S17: Hotspot and non-hotspot movement trends
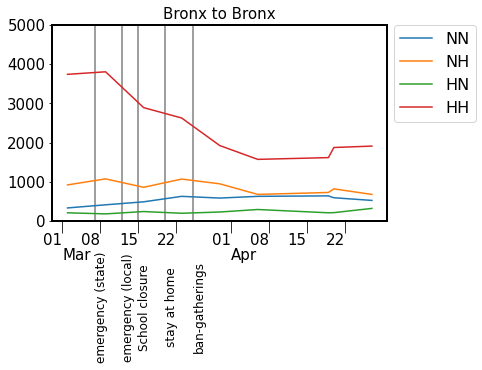
Figure S18: Hotspot and non-hotspot movement trends
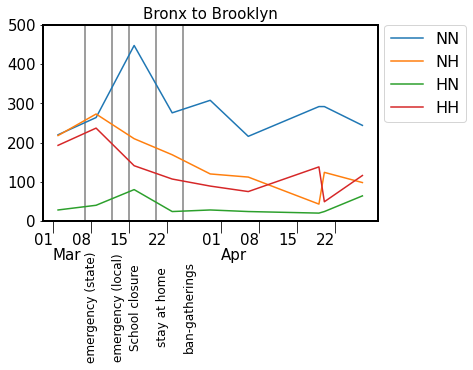
Figure S19: Hotspot and non-hotspot movement trends
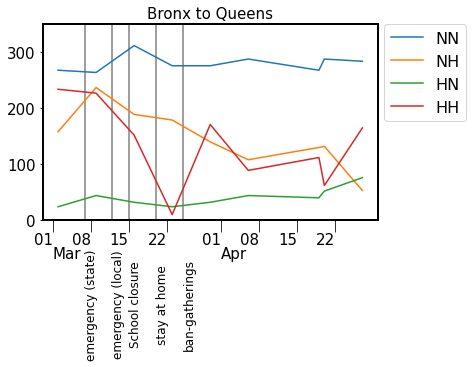
Figure S20: Hotspot and non-hotspot movement trends **
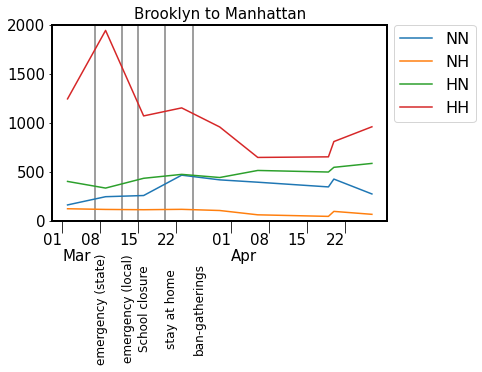
**Figure S21: Hotspot and non-hotspot movement trends
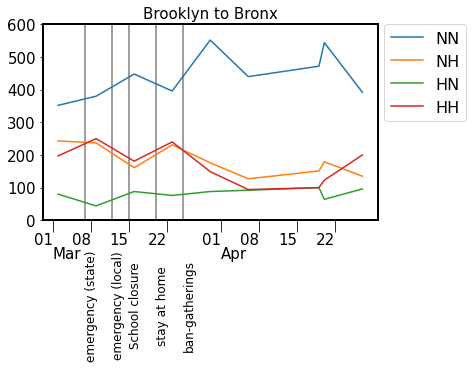
Figure S22: Hotspot and non-hotspot movement trends **
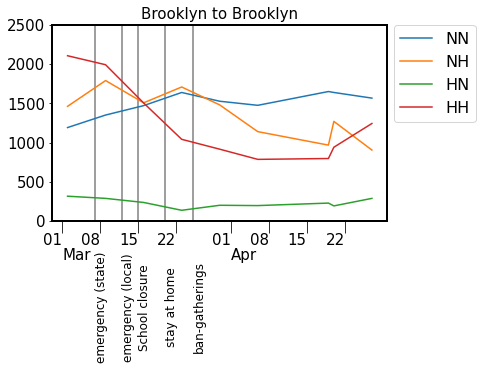
**Figure S23: Hotspot and non-hotspot movement trends
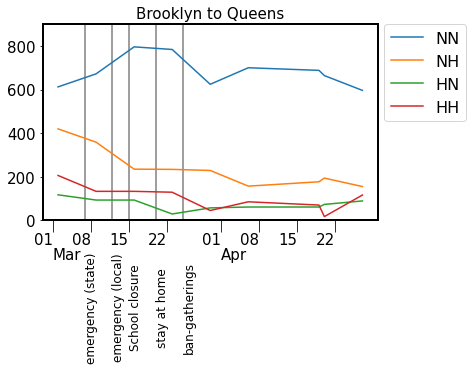
Figure S24: Hotspot and non-hotspot movement trends
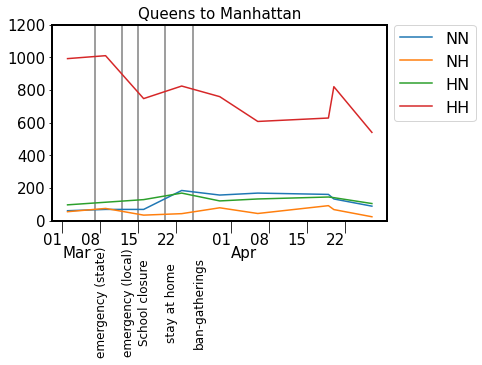
Figure S25: Hotspot and non-hotspot movement trends
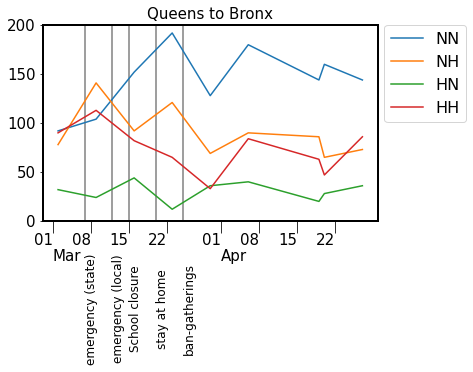
Figure S26: Hotspot and non-hotspot movement trends
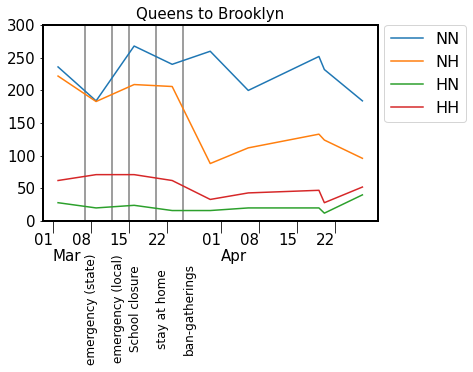
Figure S27: Hotspot and non-hotspot movement trends
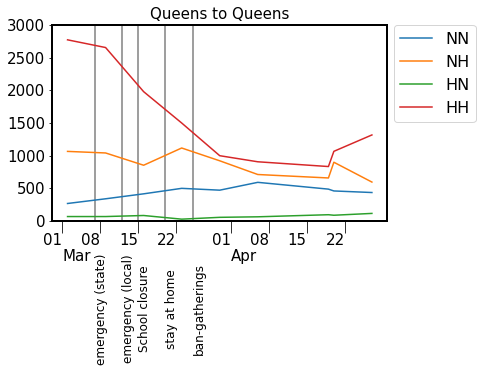
Figure S28: Hotspot and non-hotspot movement trends
